# Supplementary figures and images for: Lactiplantibacillus plantarum and Saussurea costus as Therapeutic Agents against a Diabetic Rat Model—Approaches to Investigate Pharmacophore Modeling of Human IkB Kinase and Molecular Interaction with Dehydrocostus Lactone of Saussurea costus
Source: MDPI journal article supplement (doi:10.3390/metabo13060764), 2023-06-19

Supplementary File S1 (S1)

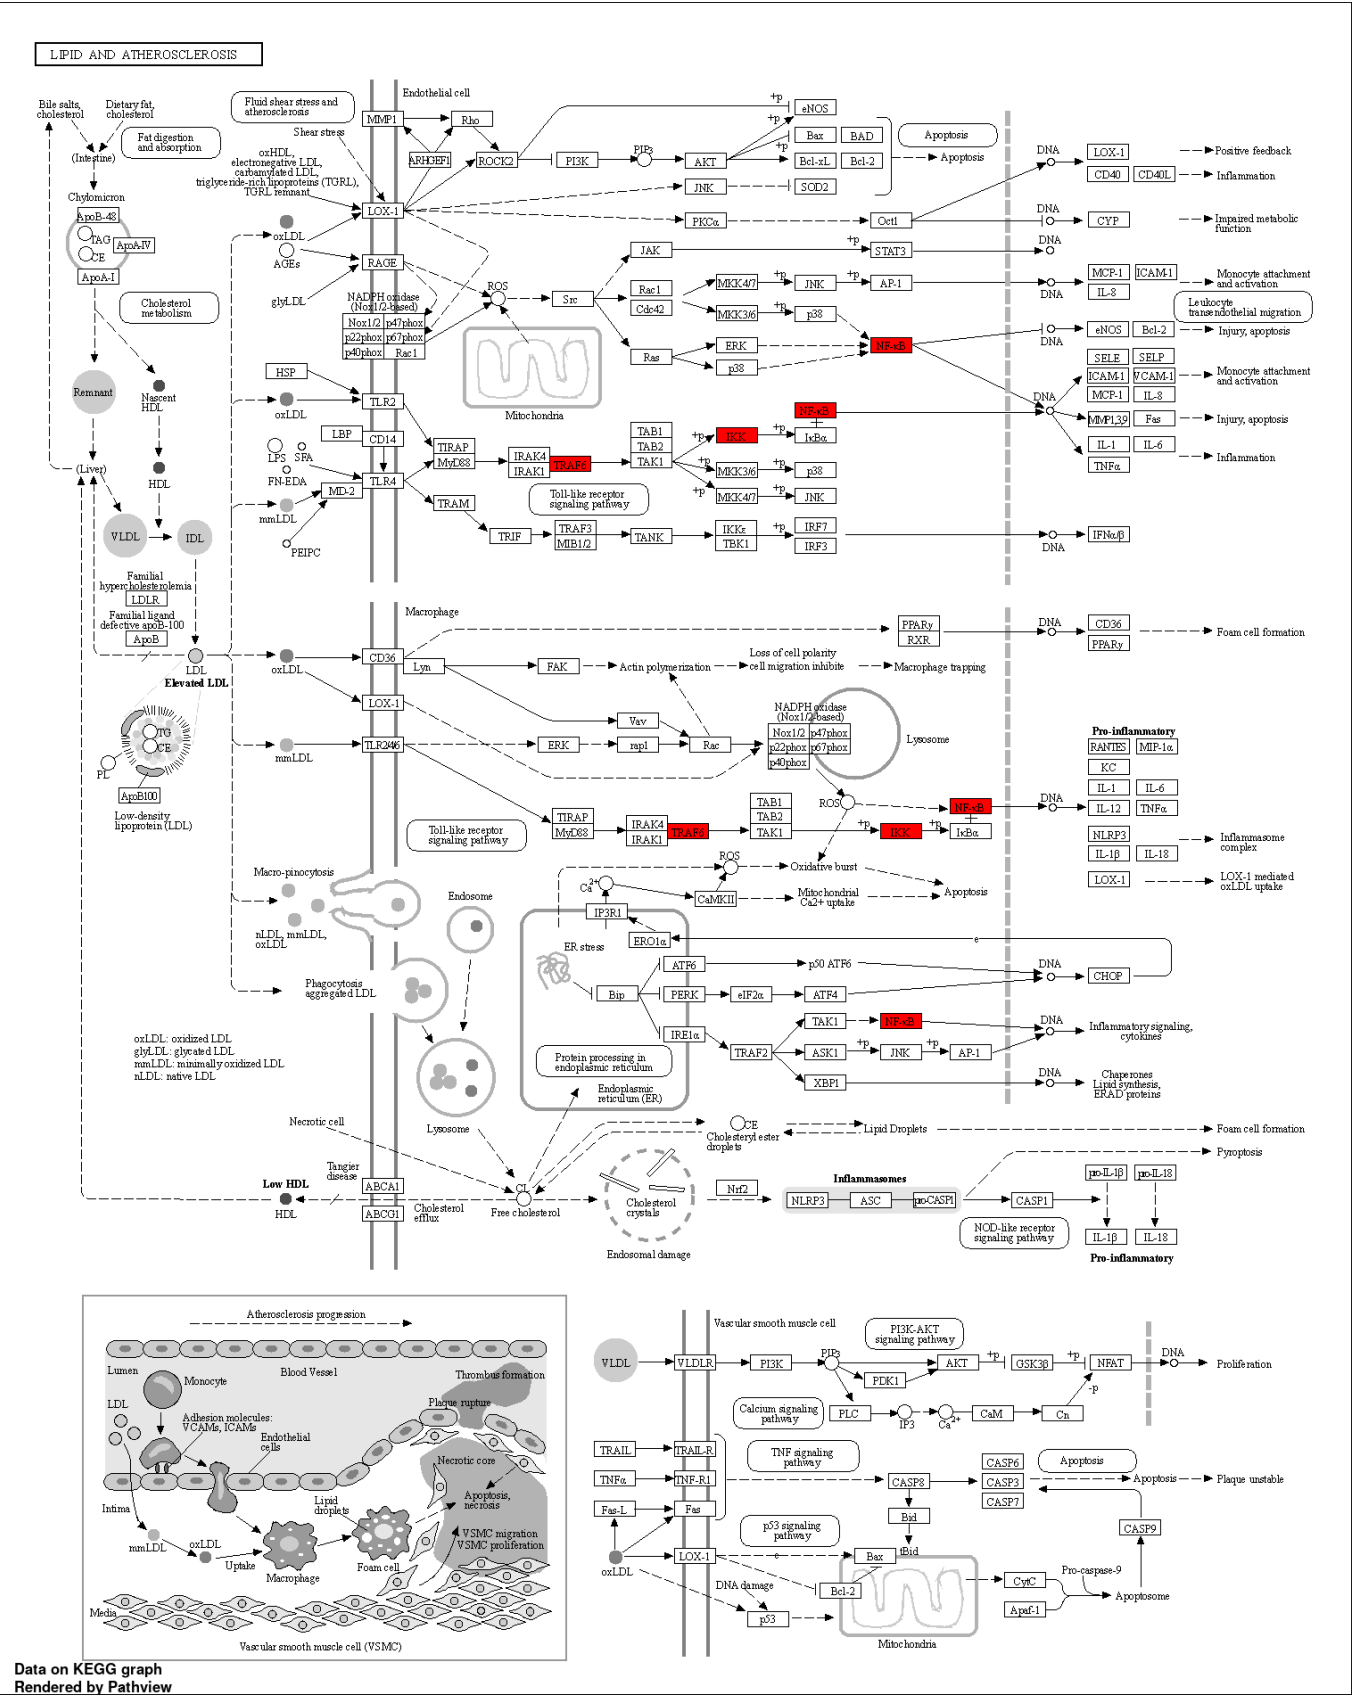

# Supplementary file 2 (S2)

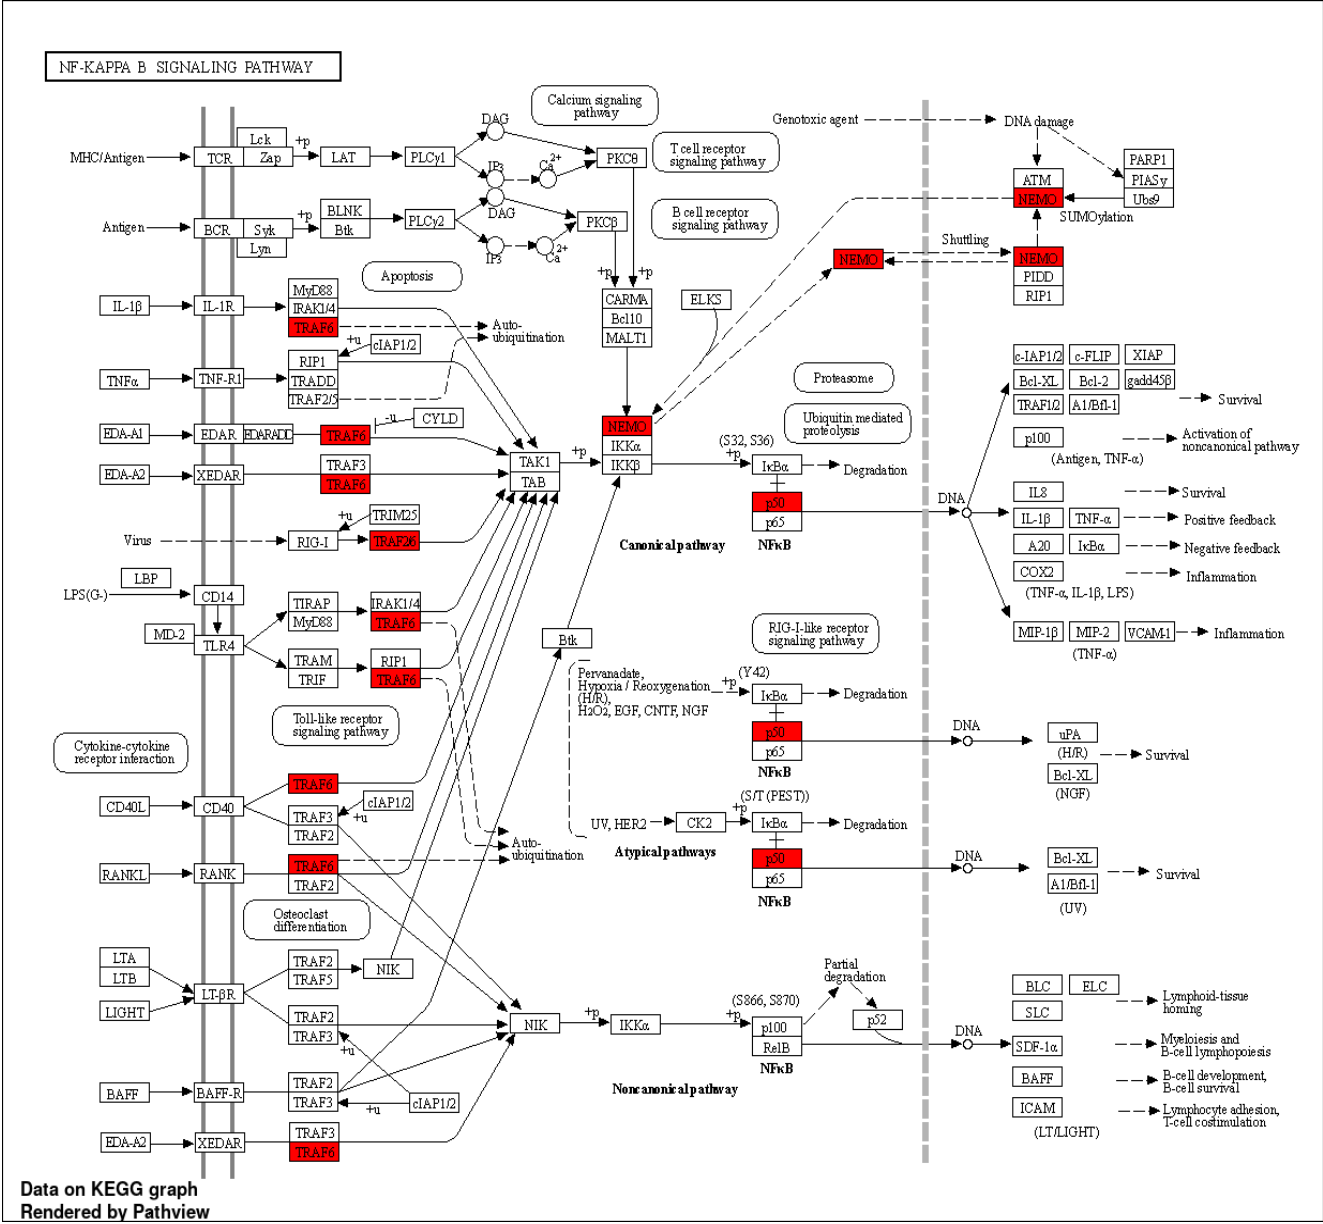

Supplementary file 3 (S3)

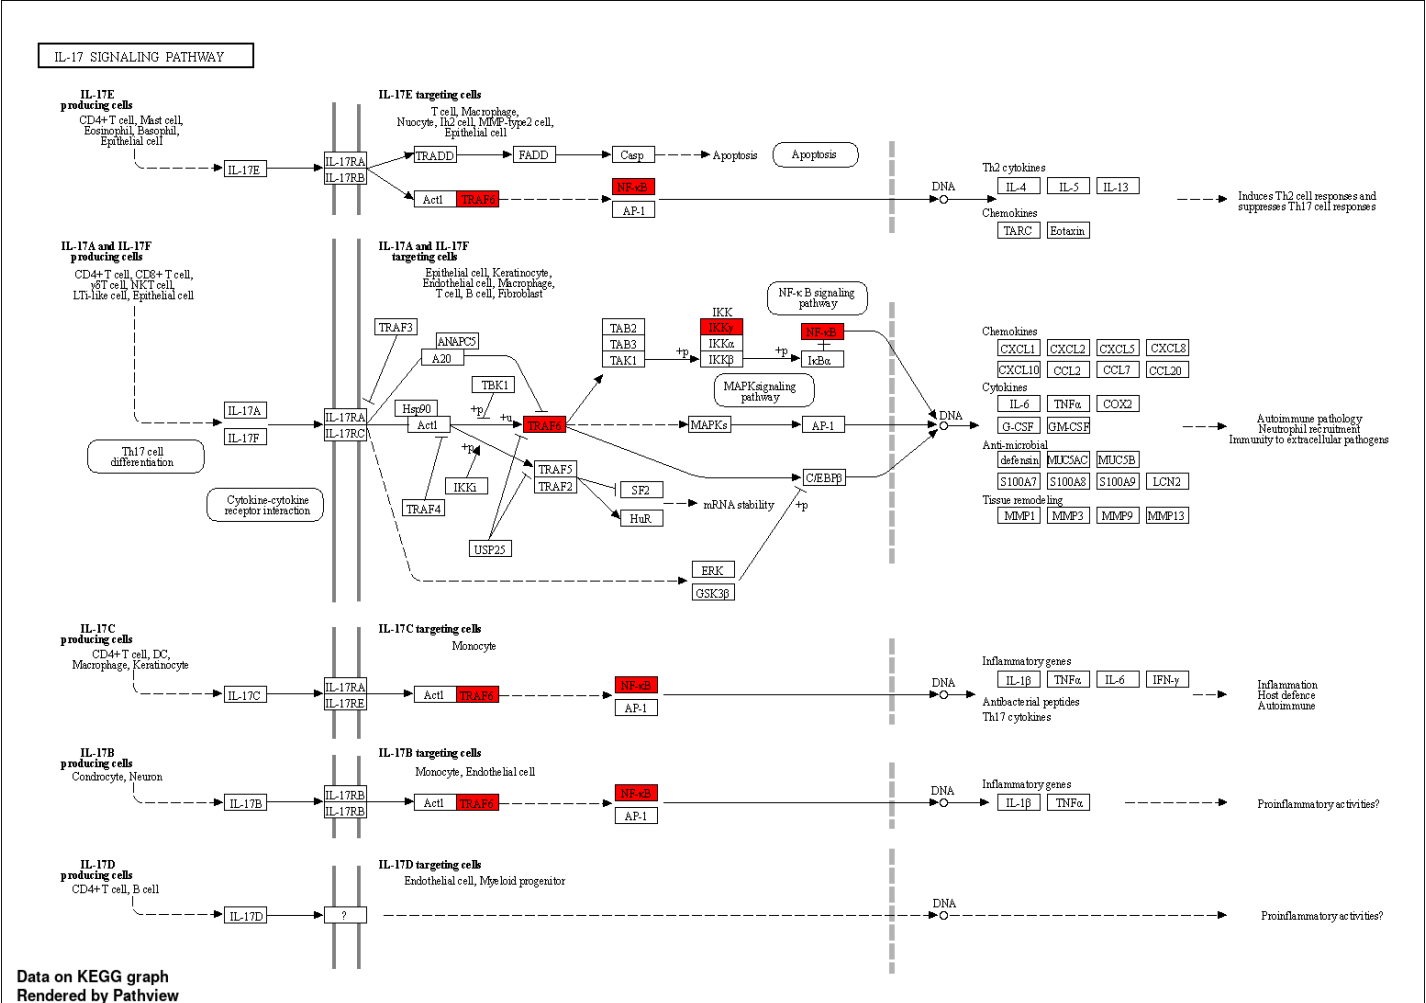

Supplement: s1 [file s1]
